# Supplementary material for: Highly dispersed CoOx in layered double oxides for oxidative dehydrogenation of propane: guest–host interactions
Source: Royal Society of Chemistry journal article supplement (doi:10.1039/c7ra01190c), 2017-01-01
Supplement: c7ra01190c1.pdf [file c7ra01190c1.pdf]

## Supporting Information

# Highly Dispersed CoO<sub>x</sub> in Layered Double Oxide for Oxidative Dehydrogenation of Propane: Guest-Host Interactions

*Ming-Xiang Huang, Xin Wu, Xiao-Dong Yi, Guo-Bin Han, Wen-Sheng Xia\*, Hui-Lin Wan\**

State Key Laboratory of Physical Chemistry of Solid State Surfaces, National Engineering  
Laboratory for Green Chemical Productions of Alcohols-Ethers-Esters, Fujian Province Key  
Laboratory of Theoretical and Computational Chemistry, College of Chemistry and Chemical  
Engineering, Xiamen University, Xiamen, Fujian 361005, P. R. China

**Corresponding author.**

E-mail: [wsxia@xmu.edu.cn](mailto:wsxia@xmu.edu.cn); [hlwan@xmu.edu.cn](mailto:hlwan@xmu.edu.cn). Tel/fax: 86-592-3658107/86-592-2183047.

Table S1 Catalytic performances of various LDO catalysts for ODHP at a different ratio of propane to oxygen in the reactant feed (PA/O) <sup>a</sup>

| Sample | PA/O  | X / %                         |                | S / %                         |                 |                               |     |                 |                     | Y <sub>C<sub>3</sub>H<sub>6</sub></sub> / % |
|--------|-------|-------------------------------|----------------|-------------------------------|-----------------|-------------------------------|-----|-----------------|---------------------|---------------------------------------------|
|        |       | C <sub>3</sub> H <sub>8</sub> | O <sub>2</sub> | C <sub>3</sub> H <sub>6</sub> | CH <sub>4</sub> | C <sub>2</sub> H <sub>4</sub> | CO  | CO <sub>2</sub> | Others <sup>b</sup> |                                             |
| CA-N   | 1:3   | 40.8                          | 100            | 8.3                           | 0.0             | 1.0                           | 0.0 | 90.6            | 0.1                 | 3.4                                         |
|        | 1:2   | 32.7                          | 100            | 11.9                          | 0.1             | 1.6                           | 0.0 | 86.3            | 0.1                 | 3.9                                         |
|        | 1:1.5 | 25.9                          | 100            | 15.0                          | 0.1             | 2.4                           | 0.0 | 82.4            | 0.1                 | 3.9                                         |
|        | 1:1   | 23.2                          | 100            | 19.9                          | 0.1             | 2.5                           | 0.0 | 77.3            | 0.2                 | 4.1                                         |
|        | 1.5:1 | 20.4                          | 100            | 22.8                          | 0.1             | 3.0                           | 0.0 | 73.9            | 0.2                 | 3.6                                         |
|        | 2:1   | 15.7                          | 100            | 26.1                          | 0.2             | 3.0                           | 0.8 | 69.6            | 0.3                 | 3.2                                         |
|        | 3:1   | 12.4                          | 100            | 30.6                          | 0.2             | 3.4                           | 0.9 | 64.5            | 0.4                 | 2.6                                         |
| CA-C   | 1:3   | 41.0                          | 100            | 9.2                           | 0.0             | 1.1                           | 0.0 | 89.6            | 0.1                 | 3.4                                         |
|        | 1:2   | 32.9                          | 100            | 13.4                          | 0.1             | 2.3                           | 0.5 | 83.6            | 0.1                 | 4.4                                         |
|        | 1:1.5 | 27.5                          | 100            | 17.9                          | 0.1             | 4.0                           | 1.6 | 76.3            | 0.1                 | 4.9                                         |
|        | 1:1   | 23.0                          | 100            | 22.2                          | 0.1             | 5.7                           | 1.2 | 70.6            | 0.2                 | 5.1                                         |
|        | 1.5:1 | 17.2                          | 100            | 25.2                          | 0.1             | 6.8                           | 0.6 | 67.1            | 0.2                 | 4.3                                         |
|        | 2:1   | 13.1                          | 100            | 28.2                          | 0.2             | 9.7                           | 0.8 | 60.8            | 0.3                 | 3.7                                         |
|        | 3:1   | 9.3                           | 100            | 31.6                          | 0.3             | 8.7                           | 0.6 | 58.3            | 0.5                 | 2.9                                         |
| CA-S   | 1:3   | 46.1                          | 100            | 18.3                          | 0.0             | 1.4                           | 5.4 | 74.8            | 0.1                 | 8.4                                         |
|        | 1:2   | 37.2                          | 100            | 22.8                          | 0.1             | 2.0                           | 3.7 | 71.3            | 0.1                 | 8.5                                         |
|        | 1:1.5 | 30.1                          | 100            | 27.3                          | 0.1             | 3.0                           | 3.0 | 66.5            | 0.1                 | 8.2                                         |
|        | 1:1   | 24.5                          | 100            | 31.1                          | 0.1             | 3.6                           | 2.4 | 62.6            | 0.2                 | 7.6                                         |
|        | 1.5:1 | 19.1                          | 100            | 36.1                          | 0.1             | 3.7                           | 2.2 | 57.7            | 0.2                 | 6.9                                         |
|        | 2:1   | 14.4                          | 100            | 41.1                          | 0.2             | 2.4                           | 1.7 | 54.2            | 0.3                 | 5.9                                         |
|        | 3:1   | 10.6                          | 100            | 42.9                          | 0.3             | 1.9                           | 1.7 | 52.8            | 0.4                 | 4.5                                         |
| CA-P   | 1:3   | 50.1                          | 100            | 21.7                          | 0.0             | 1.3                           | 2.0 | 74.9            | 0.1                 | 10.9                                        |
|        | 1:2   | 39.9                          | 100            | 28.1                          | 0.1             | 1.9                           | 3.6 | 66.3            | 0.1                 | 11.2                                        |
|        | 1:1.5 | 32.5                          | 100            | 33.3                          | 0.1             | 2.6                           | 4.4 | 59.6            | 0.1                 | 10.8                                        |
|        | 1:1   | 25.4                          | 100            | 36.8                          | 0.1             | 3.5                           | 4.0 | 54.5            | 0.2                 | 10.1                                        |
|        | 1.5:1 | 20.3                          | 100            | 41.3                          | 0.1             | 3.1                           | 3.1 | 52.1            | 0.2                 | 8.4                                         |
|        | 2:1   | 15.5                          | 100            | 46.9                          | 0.2             | 2.2                           | 3.0 | 47.4            | 0.3                 | 7.3                                         |
|        | 3:1   | 11.9                          | 100            | 49.0                          | 0.2             | 1.7                           | 2.0 | 46.0            | 0.4                 | 5.8                                         |

<sup>a</sup> The data were obtained after 30 min on stream (reaction conditions: T = 400 °C;

C<sub>3</sub>H<sub>8</sub>:O<sub>2</sub>:He=PA:O:4; GHSV=30,000 mL·g<sub>cat</sub><sup>-1</sup>·h<sup>-1</sup>; <sup>b</sup> Others=C<sub>3</sub>H<sub>4</sub>O+CH<sub>3</sub>CH<sub>2</sub>CHO+CH<sub>3</sub>COCH<sub>3</sub>).

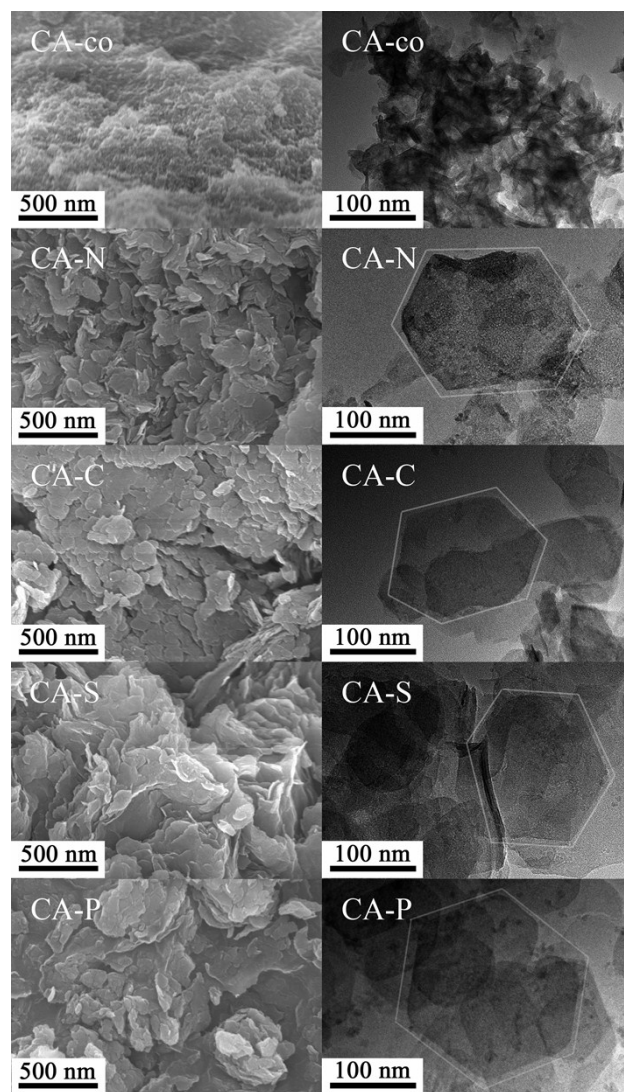

Fig.S1 Morphology of the LDH samples: The SEM (left) and TEM (right) images.

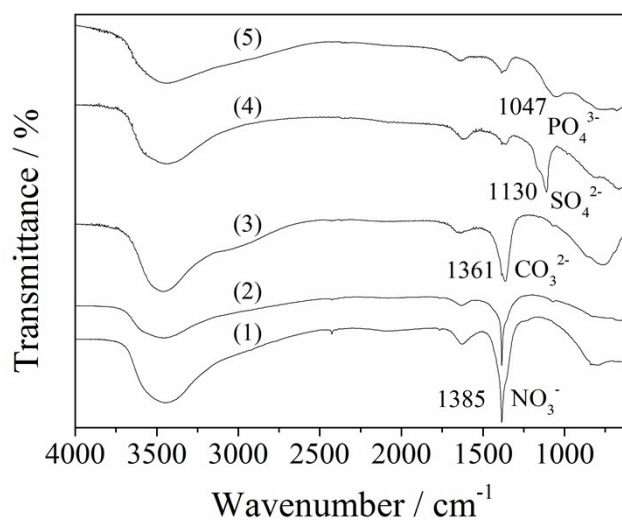

Fig.S2 FT-IR spectra of the LDH samples: (1) CA-co, (2) CA-N, (3) CA-C, (4) CA-S, and (5) CA-P.

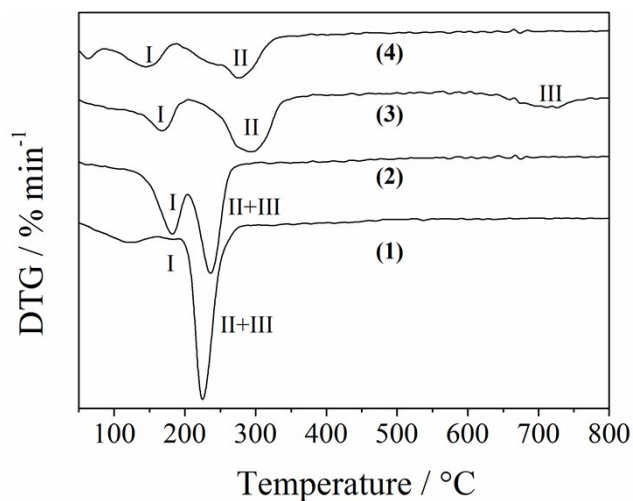

Fig.S3 Differential thermal gravimetric (DTG) profiles for the decomposition of the LDH samples: CA-N (1), CA-C (2), CA-S (3), and CA-P (4). ((I) loss of interlayer water; (II) dehydroxylation of the brucite-like sheets; (III) loss of interlayer anions)

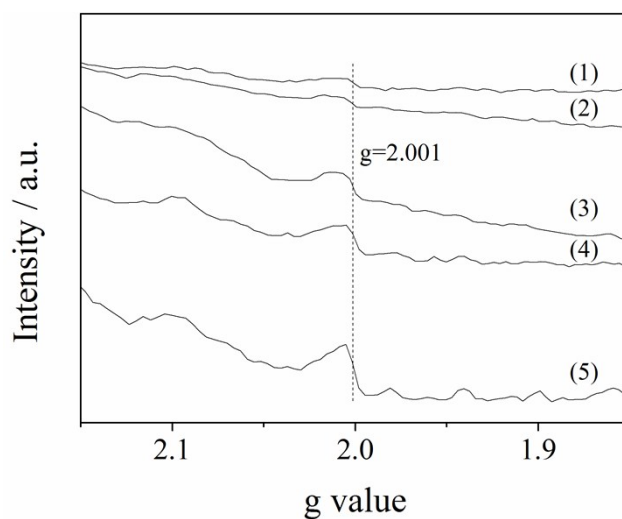

Fig.S4 EPR spectra of the LDO samples: (1) CA-co, (2) CA-N, (3) CA-C, (4) CA-S, and (5) CA-P.

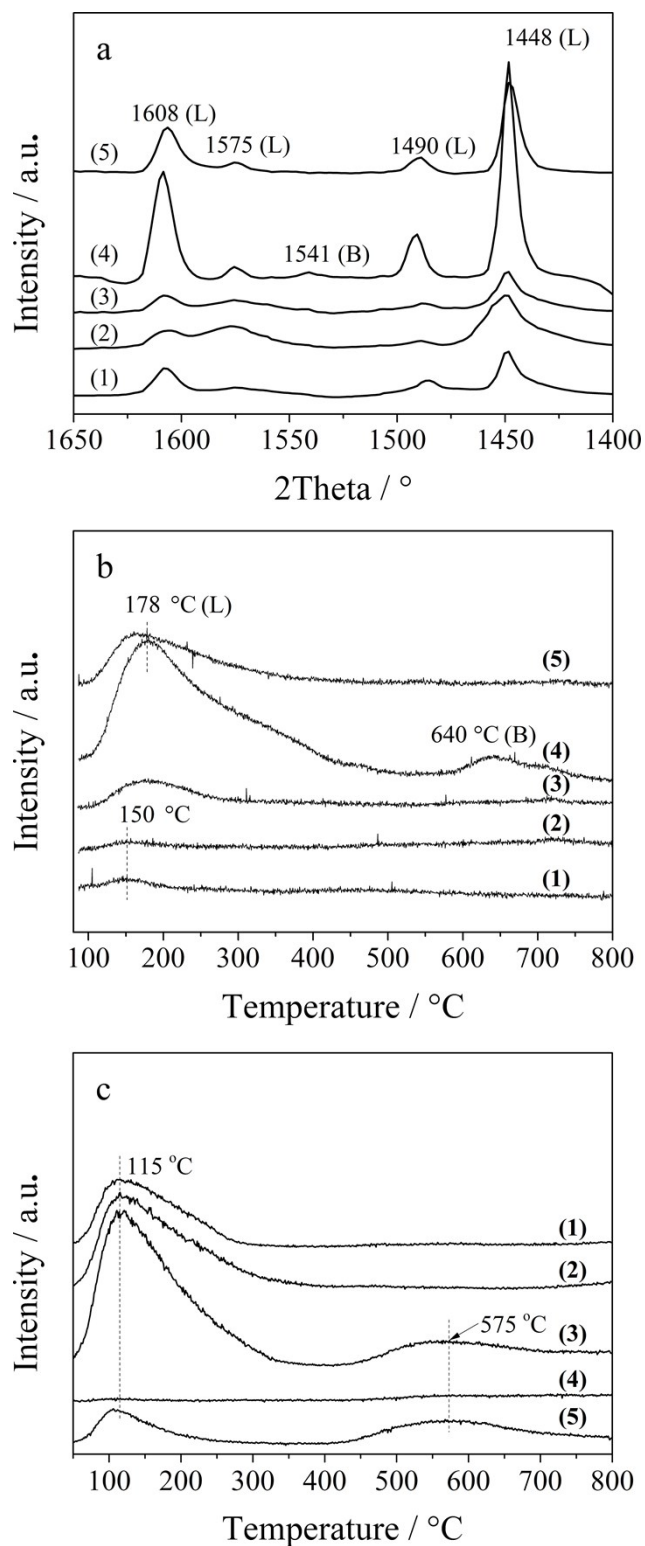

Fig.S5 The FT-IR spectra (a) of pyridine adsorbed on the LDO samples, NH<sub>3</sub>-TPD profiles (b) and CO<sub>2</sub>-TPD profiles (c) of the LDO samples for Lewis (L) and Brønsted (B) acid/base measurements. CA-co (1), CA-N (2), CA-C (3), CA-S (4) and CA-P (5).

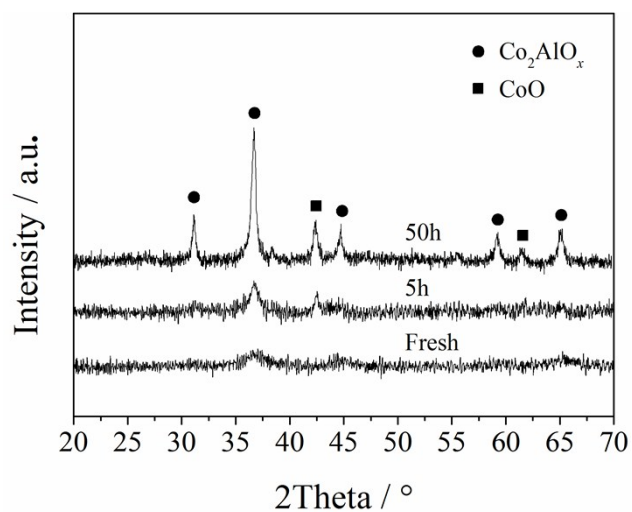

Fig.S6 XRD patterns of the CA-P LDO through ODHP for both 5 hours and 50 hours

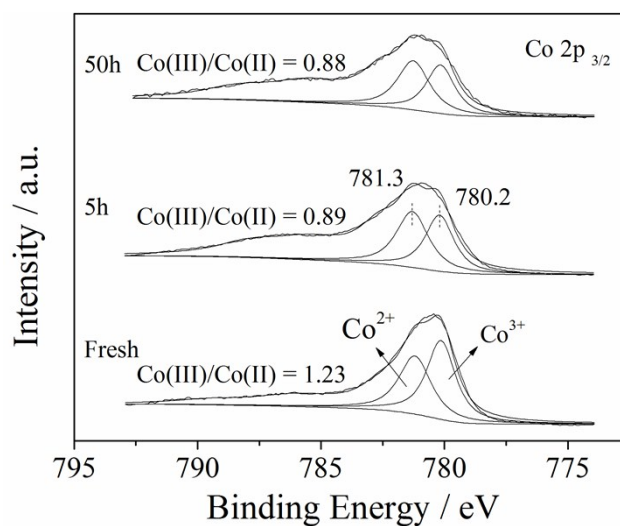

Fig.S7 XPS spectra of CA-P LDO through ODHP for both 5 hours and 50 hours
